# Supplementary material
Source: MDPI journal article supplement (https://www.mdpi.com/2073-4395/7/2/34)
Supplement: s1 [file s1]

**Table S1**. Mean effects of agronomic traits across red clover accessions.

| Line no. | Cultivar/  accession | Origin | Autumn Recovery | Flowering Time (days) | Growth Habit Spring/  Summer | Leaf Shape | Prolificacy of Flowering | Stem Colour | Winter DM yield  (kg/ha) | Leaf Width (mm) | Leaf Length (mm) | Total Leaf Area  (loge cm2) | Stipule Pigmentation |
| --- | --- | --- | --- | --- | --- | --- | --- | --- | --- | --- | --- | --- | --- |
| 1 | PAC 19 | Chile | 1.94 | 71.9 | 2.47 | 2.12 | 4.12 | 1.53 | 6.58 | 19.6 | 24.3 | 2.19 | 2.04 |
| 2 | A9807 | Unknown | 1.71 | 49.1 | 2.54 | 1.89 | 4.86 | 1.68 | 5.23 | 17.8 | 24.6 | 2.19 | 1.76 |
| 3 | Rajah | Denmark | 1.51 | 71.7 | 4.73 | 2.24 | 4.79 | 1.59 | 3.90 | 14.6 | 17.9 | 1.61 | 1.62 |
| 4 | SA 26.449 | Turkey | 2.13 | 45.3 | 4.95 | 2.24 | 4.73 | 1.59 | 7.41 | 15.8 | 19.6 | 1.78 | 2.09 |
| 5 | PI 4379 | Unknown | 1.60 | 43.3 | 3.09 | 2.16 | 5.41 | 1.87 | 5.78 | 17.3 | 23.7 | 2.11 | 2.33 |
| 6 | SA 20.017 | Turkey | 1.86 | 30.4 | 5.45 | 2.16 | 4.65 | 1.72 | 6.10 | 13.7 | 18.0 | 1.58 | 2.92 |
| 7 | PI 4377 | Unknown | 1.56 | 56.6 | 3.03 | 2.28 | 5.10 | 1.66 | 5.08 | 16.5 | 21.6 | 1.88 | 1.87 |
| 8 | S48/ 9732 | Turkey | 1.75 | 45.4 | 5.61 | 2.15 | 4.65 | 1.75 | 6.07 | 16.1 | 21.3 | 1.89 | 2.67 |
| 9 | El Sureno | Argentina | 0.95 | 43.2 | 2.76 | 2.15 | 5.31 | 1.66 | 4.36 | 19.5 | 25.8 | 2.23 | 2.41 |
| 10 | SA 758 | Morocco | 2.68 | 69.7 | 5.34 | 2.12 | 3.24 | 1.72 | 7.95 | 17.6 | 22.8 | 2.14 | 3.37 |
| 11 | Renegade | USA | 1.67 | 43.7 | 2.53 | 2.11 | 4.93 | 1.93 | 5.37 | 17.6 | 24.9 | 2.05 | 2.04 |
| 12 | H: 4949 | Unknown | 1.67 | 51.2 | 3.06 | 2.24 | 5.76 | 1.55 | 6.33 | 17.6 | 22.5 | 2.09 | 1.76 |
| 13 | Krano | Denmark | 1.82 | 46.8 | 2.81 | 2.06 | 5.27 | 1.62 | 5.67 | 17.5 | 22.8 | 1.99 | 1.82 |
| 14 | PI 5290 | Unknown | 1.47 | 52.7 | 2.95 | 2.14 | 5.35 | 2.02 | 5.92 | 18.3 | 23.6 | 1.91 | 2.39 |
| 15 | T 106 | Tunisia | 2.54 | 46.4 | 4.91 | 2.06 | 4.71 | 2.53 | 9.88 | 17.6 | 23.8 | 2.15 | 3.08 |
| 16 | SA 15.891 | Turkey | 1.74 | 71.5 | 4.45 | 2.14 | 3.43 | 1.89 | 5.29 | 14.2 | 19.1 | 1.56 | 2.43 |
| 17 | H: 7565 | Unknown | 1.25 | 56.5 | 3.46 | 2.35 | 5.11 | 1.73 | 5.41 | 17.4 | 21.2 | 1.97 | 2.13 |
| 18 | SA 22.825 | UK | 1.25 | 42.2 | 4.22 | 2.17 | 5.53 | 1.63 | 5.11 | 15.5 | 21.7 | 1.85 | 1.78 |
| 19 | Cherokee | USA | 1.42 | 38.3 | 2.90 | 2.11 | 5.14 | 1.62 | 5.89 | 17.5 | 24.1 | 2.05 | 1.84 |
| 20 | SA 32.382 | Turkey | 1.92 | 34.7 | 4.99 | 2.13 | 4.45 | 1.80 | 6.42 | 15.7 | 20.2 | 1.73 | 2.61 |
| 21 | S42/ 9635 | Turkey | 2.27 | 66.2 | 5.64 | 2.02 | 4.37 | 2.34 | 6.91 | 16.1 | 22.0 | 1.94 | 3.19 |
| 22 | M 98 | Morocco | 2.75 | 83.2 | 5.65 | 2.11 | 3.39 | 1.73 | 8.64 | 17.2 | 22.1 | 2.05 | 2.93 |
| 23 | SA 32.377 | Turkey | 2.02 | 48.3 | 5.23 | 2.28 | 4.17 | 1.85 | 6.87 | 17.4 | 22.5 | 2.05 | 2.02 |
| 24 | SA 21.963 | Uruguay | 1.40 | 36.9 | 2.63 | 2.04 | 5.35 | 1.76 | 5.75 | 17.5 | 25.7 | 2.16 | 2.20 |
| 25 | S36 | Sardinia | 2.48 | 55.2 | 5.71 | 2.10 | 3.79 | 1.97 | 8.53 | 15.9 | 20.5 | 1.82 | 2.48 |
| 26 | SA 901 | UK | 1.61 | 49.3 | 3.36 | 2.34 | 5.19 | 1.71 | 5.54 | 17.0 | 21.1 | 1.84 | 2.20 |
| 27 | SA 8.440 | Russia | 1.48 | 44.3 | 3.17 | 2.33 | 4.60 | 1.57 | 5.39 | 15.5 | 19.7 | 1.72 | 2.20 |
| 28 | Colenso | New Zealand | 1.34 | 58.0 | 2.89 | 2.28 | 5.31 | 1.59 | 5.08 | 17.5 | 22.2 | 2.08 | 1.91 |
| 29 | SA 32.376 | Turkey | 2.16 | 53.5 | 5.05 | 2.22 | 4.77 | 1.76 | 6.93 | 16.8 | 22.0 | 1.96 | 2.05 |
| 30 | SA 26.500 | Turkey | 2.05 | 46.0 | 4.93 | 2.15 | 4.66 | 2.08 | 6.72 | 16.3 | 24.3 | 2.05 | 2.66 |
| 31 | Hamidori | Japan | 1.50 | 60.4 | 2.78 | 2.26 | 4.54 | 1.71 | 4.60 | 15.7 | 18.9 | 1.67 | 1.50 |
| 32 | M 80 | Morocco | 2.64 | 66.9 | 5.48 | 2.10 | 3.75 | 1.70 | 9.17 | 16.7 | 21.8 | 2.12 | 3.73 |
| 33 | S44/ 9664 | Turkey | 1.93 | 40.9 | 5.54 | 2.08 | 5.31 | 2.29 | 6.68 | 16.1 | 22.2 | 1.88 | 2.89 |
| 34 | Quinqueli | Chile | 1.16 | 56.9 | 3.47 | 2.18 | 4.87 | 2.00 | 5.61 | 19.0 | 24.7 | 2.15 | 2.14 |
| 35 | SA 18.686 | Australia | 1.47 | 43.5 | 3.29 | 2.22 | 5.56 | 1.67 | 6.15 | 18.0 | 23.2 | 2.04 | 2.12 |
| 36 | SwisSelectn | Switzerland | 1.63 | 49.4 | 2.19 | 2.22 | 4.74 | 1.45 | 5.51 | 19.4 | 24.8 | 2.23 | 1.78 |
| 37 | S46/ 9679 | Turkey | 1.93 | 53.2 | 5.79 | 2.12 | 4.61 | 1.76 | 5.88 | 16.5 | 20.9 | 1.86 | 2.35 |
| 38 | M 154 | Morocco | 2.54 | 69.8 | 5.74 | 2.46 | 3.16 | 1.75 | 8.10 | 16.8 | 21.2 | 1.98 | 2.32 |
| 39 | A9806 | Turkey | 1.26 | 52.8 | 2.80 | 2.19 | 5.36 | 1.67 | 5.11 | 22.2 | 28.9 | 2.44 | 1.80 |
| 40 | Redquin | Australia | 1.45 | 45.1 | 2.82 | 2.22 | 5.42 | 1.71 | 4.91 | 19.8 | 24.4 | 2.14 | 1.79 |
| 41 | Makimidori | Japan | 1.51 | 57.2 | 2.76 | 2.18 | 4.75 | 1.96 | 5.17 | 15.4 | 18.6 | 1.70 | 2.24 |
| 42 | SA 32.381 | Turkey | 2.10 | 49.8 | 5.18 | 2.18 | 4.05 | 1.55 | 7.32 | 17.7 | 24.2 | 2.20 | 2.46 |
| 43 | S47/ 9706 | Turkey | 1.87 | 57.3 | 5.54 | 2.16 | 4.69 | 2.31 | 6.20 | 14.1 | 18.3 | 1.59 | 2.64 |
| 44 | Concorde | Unknown | 1.52 | 53.6 | 2.99 | 2.21 | 5.23 | 1.82 | 4.56 | 15.5 | 20.0 | 1.80 | 1.78 |
| 45 | Maneta | France | 1.69 | 68.3 | 2.57 | 2.24 | 3.92 | 1.71 | 5.65 | 17.8 | 22.2 | 1.92 | 2.13 |
| 46 | SA 19676 | Afghanistan | 1.12 | 28.0 | 2.90 | 2.13 | 4.89 | 1.71 | 4.07 | 16.1 | 21.8 | 1.89 | 1.91 |
| 47 | Hamua | New Zealand | 1.21 | 53.0 | 2.92 | 2.07 | 5.92 | 1.59 | 4.95 | 16.7 | 22.7 | 1.95 | 2.36 |
| 48 | PI 4383 | Unknown | 2.10 | 64.6 | 3.53 | 2.00 | 3.02 | 1.86 | 6.38 | 17.4 | 23.5 | 2.07 | 2.38 |
| 49 | PI 4378 | Unknown | 1.14 | 51.6 | 2.85 | 2.32 | 5.28 | 1.83 | 5.39 | 16.9 | 22.2 | 1.99 | 1.94 |
| 50 | SA 22.000 | USA | 1.14 | 43.6 | 2.57 | 2.24 | 5.51 | 1.66 | 4.59 | 18.7 | 23.8 | 2.00 | 2.36 |
| 51 | SA 32.380 | Turkey | 1.19 | 41.6 | 3.83 | 2.07 | 5.19 | 1.59 | 4.93 | 17.2 | 24.3 | 2.09 | 2.03 |
| 52 | SA 32.374 | Turkey | 2.09 | 29.5 | 5.29 | 1.88 | 4.36 | 1.84 | 6.91 | 16.8 | 22.2 | 1.90 | 2.11 |
| 53 | S59/ 9895 | Turkey | 1.56 | 34.2 | 5.73 | 2.12 | 4.35 | 1.70 | 5.97 | 15.5 | 19.8 | 1.71 | 2.40 |
| 54 | SA 32.061 | Russia | 2.16 | 51.0 | 5.85 | 2.22 | 4.28 | 1.91 | 6.83 | 16.5 | 21.0 | 1.88 | 2.23 |
| 55 | FLMR7 | USA | 1.53 | 48.3 | 4.02 | 2.20 | 5.38 | 1.74 | 4.62 | 15.6 | 20.1 | 1.66 | 2.64 |
| 56 | LE 116 | Uruguay | 1.63 | 33.2 | 2.49 | 2.15 | 5.75 | 1.56 | 6.61 | 21.0 | 27.6 | 2.36 | 1.95 |
| 57 | PI 6435 | Unknown | 1.32 | 41.7 | 2.77 | 2.06 | 5.30 | 1.72 | 5.12 | 20.2 | 27.5 | 2.32 | 2.73 |
| 58 | Kenland | USA | 2.04 | 51.4 | 5.64 | 2.30 | 4.07 | 1.77 | 6.72 | 16.3 | 21.2 | 1.94 | 2.70 |
| 59 | Astred | Portugal | 1.28 | 43.2 | 2.70 | 2.40 | 5.30 | 1.74 | 5.12 | 18.0 | 22.7 | 2.04 | 1.78 |
| 60 | S49/ 9742 | Turkey | 0.99 | 40.9 | 2.88 | 2.01 | 5.46 | 2.05 | 4.89 | 17.4 | 24.9 | 2.16 | 2.33 |
| 61 | SA 12.274 | Turkey | 1.19 | 50.6 | 3.91 | 2.34 | 5.74 | 1.62 | 5.03 | 15.9 | 20.5 | 1.84 | 2.10 |
| 62 | P42 | Unknown | 1.90 | 55.2 | 5.51 | 2.08 | 5.00 | 2.03 | 5.95 | 15.4 | 20.1 | 1.84 | 3.13 |
| 63 | T 98 | Tunisia | 1.50 | 40.0 | 5.63 | 2.15 | 4.79 | 1.60 | 5.65 | 16.3 | 20.6 | 1.91 | 2.52 |
| 64 | 37796 | Unknown | 1.81 | 42.2 | 4.04 | 2.06 | 4.84 | 1.83 | 7.08 | 20.5 | 27.1 | 2.33 | 1.73 |
| S.e.d |  |  | 0.229 | 3.47 | 0.287 | 0.216 | 0.460 | 0.319 | 0.871 | 1.77 | 2.78 | 0.233 | 0.504 |

**Table S2**. Mean effects of isoflavone concentrations (%DM) across red clover accessions

| Cultivar/ line no. | Cultivar/accession | Origin | Daidzein | Genistein | Formononetin | Biochanin | Total Isoflavone |
| --- | --- | --- | --- | --- | --- | --- | --- |
| 1 | PAC 19 | Chile | 0.011 | 0.04 | 0.59 | 0.62 | 1.26 |
| 3 | Rajah | Denmark | 0.009 | 0.01 | 0.67 | 0.53 | 1.25 |
| 4 | SA 26.449 | Turkey | 0.006 | 0.00 | 0.28 | 0.59 | 0.88 |
| 5 | PI 4379 | Unknown | 0.019 | 0.04 | 0.47 | 0.57 | 1.10 |
| 6 | SA 20.017 | Turkey | 0.007 | 0.03 | 0.31 | 0.62 | 0.97 |
| 7 | PI 4377 | Unknown | 0.014 | 0.02 | 0.68 | 0.63 | 1.34 |
| 8 | S48/ 9732 | Turkey | 0.008 | 0.05 | 0.33 | 0.33 | 0.71 |
| 9 | El Sureno | Argentina | 0.005 | 0.08 | 0.59 | 0.78 | 1.45 |
| 10 | SA 758 | Morocco | 0.008 | 0.03 | 0.13 | 0.10 | 0.27 |
| 11 | Renegade | USA | 0.014 | 0.02 | 0.48 | 0.50 | 1.01 |
| 13 | Krano | Denmark | 0.007 | 0.01 | 0.27 | 0.78 | 1.06 |
| 14 | PI 5290 | Unknown | 0.008 | 0.01 | 0.51 | 0.67 | 1.20 |
| 15 | T 106 | Tunisia | 0.060 | 0.01 | 0.29 | 0.17 | 0.53 |
| 16 | SA 15.891 | Turkey | 0.005 | 0.03 | 0.41 | 0.56 | 0.99 |
| 18 | SA 22.825 | UK | 0.010 | 0.01 | 0.32 | 0.82 | 1.16 |
| 19 | Cherokee | USA | 0.010 | 0.01 | 0.37 | 0.74 | 1.13 |
| 20 | SA 32.382 | Turkey | 0.012 | 0.00 | 0.34 | 0.47 | 0.82 |
| 21 | S42/ 9635 | Turkey | 0.007 | 0.01 | 0.44 | 0.54 | 0.99 |
| 22 | M 98 | Morocco | 0.006 | 0.00 | 0.02 | 0.13 | 0.17 |
| 23 | SA 32.377 | Turkey | 0.013 | 0.03 | 0.22 | 0.31 | 0.58 |
| 24 | SA 21.963 | Uruguay | 0.009 | 0.01 | 0.57 | 0.62 | 1.20 |
| 25 | S36 | Sardinia | 0.009 | 0.02 | 0.16 | 0.91 | 1.09 |
| 26 | SA 901 | UK | 0.003 | 0.01 | 0.29 | 0.76 | 1.06 |
| 27 | SA 8.440 | Russia | 0.008 | 0.01 | 0.23 | 0.45 | 0.68 |
| 28 | Colenso | New Zealand | 0.007 | 0.02 | 0.56 | 0.71 | 1.30 |
| 29 | SA 32.376 | Turkey | 0.012 | 0.01 | 0.39 | 0.39 | 0.80 |
| 30 | SA 26.500 | Turkey | 0.014 | 0.01 | 0.28 | 0.27 | 0.57 |
| 32 | M 80 | Morocco | 0.006 | 0.00 | 0.58 | 0.07 | 0.14 |
| 33 | S44/ 9664 | Turkey | 0.008 | 0.05 | 0.19 | 0.37 | 0.62 |
| 34 | Quinqueli | Chile | 0.005 | 0.01 | 0.62 | 0.66 | 1.23 |
| 35 | SA 18.686 | Australia | 0.004 | 0.01 | 0.25 | 0.78 | 1.05 |
| 37 | S46/ 9679 | Turkey | 0.006 | 0.01 | 0.35 | 0.44 | 0.80 |
| 38 | M 154 | Morocco | 0.008 | 0.00 | 0.07 | 0.18 | 0.27 |
| 42 | SA 32.381 | Turkey | 0.009 | 0.01 | 0.31 | 0.35 | 0.67 |
| 43 | S47/ 9706 | Turkey | 0.018 | 0.03 | 0.37 | 0.23 | 0.65 |
| 46 | SA 19676 | Afghanistan | 0.005 | 0.00 | 0.08 | 0.23 | 0.31 |
| 47 | Hamua | New Zealand | 0.005 | 0.01 | 0.52 | 0.70 | 1.23 |
| 49 | PI 4378 | Unknown | 0.026 | 0.03 | 0.55 | 0.57 | 1.17 |
| 51 | SA 32.380 | Turkey | 0.007 | 0.02 | 0.17 | 0.34 | 0.53 |
| 52 | SA 32.374 | Turkey | 0.013 | 0.05 | 0.30 | 0.21 | 0.57 |
| 53 | S59/ 9895 | Turkey | 0.004 | 0.01 | 0.09 | 0.09 | 0.19 |
| 54 | SA 32.061 | Russia | 0.010 | 0.01 | 0.27 | 0.49 | 0.78 |
| 55 | FLMR7 | USA | 0.006 | 0.00 | 0.28 | 0.50 | 0.79 |
| 56 | LE 116 | Uruguay | 0.009 | 0.01 | 0.86 | 0.51 | 1.39 |
| 58 | Kenland | USA | 0.007 | 0.04 | 0.12 | 0.19 | 0.36 |
| 59 | Astred | Portugal | 0.018 | 0.02 | 0.55 | 0.68 | 1.26 |
| 61 | SA 12.274 | Turkey | 0.004 | 0.01 | 0.56 | 0.72 | 1.29 |
| 62 | P42 | Unknown | 0.010 | 0.01 | 0.38 | 0.66 | 1.06 |
| 63 | T 98 | Tunisia | 0.013 | 0.00 | 0.25 | 0.16 | 0.43 |
| S.e.d |  |  | 0.011 | 0.340 | 0.231 | 0.271 | 0.408 |
